# Supplementary material for: A male sterility-associated cytotoxic protein ORF288 in Brassica juncea causes aborted pollen development
Source: PubMed Central journal article supplement — J Exp Bot. 2011 Nov 16;63(3):1285–95. doi: 10.1093/jxb/err355 (PMC3276091; doi:10.1093/jxb/err355), 2011-11-16

# A male sterility-associated cytotoxic protein ORF288 in *Brassica*

## *juncea* causes aborted pollen development

Bing Jing, Shuangping Heng, Dan Tong, Zhengjie Wan, Tingdong Fu, Jinxing Tu, Chaozhi Ma,

Bin Yi, Jing Wen, Jinxiong Shen

### Supplementary Data

**Table S1** Primers used in experiments

| Name             | Sequence(5'-3')             | Application    |
|------------------|-----------------------------|----------------|
| 288GSP1          | AGCAGAATCACCTAGATCAACCAGCTG | genome-walking |
| 288GSP2          | ATCAACTTGGCATAACTCTCGAGGATG | genome-walking |
| atp6DGSP1        | GGTTCGCTTGGACTATGCTATGTATGA | genome-walking |
| atp6DGSP2        | TTATAGTTCTTGCATTAACCGGTCTGG | genome-walking |
| adaptor primer 1 | GTAATACGACTCACTATAGGGC      | genome-walking |
| adaptor primer 2 | ACTATAGGGCACGCGTGGT         | genome-walking |
| atpA             | GCTGCGGAACTAACGAATCTA       | probe          |
|                  | AATCCACCTTTAAGGGCTTGT       | probe          |
| atp9             | TGTTAGAAGGTGCAAAATCAA       | probe          |
|                  | GCAAACAATGCAATAGCTTCG       | probe          |
| orfB             | TGCCTTTTCTTCTTTACTTTC       | probe          |
|                  | CCAGTATTTGAAGGAGAGGAC       | probe          |
| KpnI288STR       | GGGGTACCATGAAAAATAGACTCCAAT | RT-PCR         |
|                  | GG                          |                |

---

|              |                                        |                  |
|--------------|----------------------------------------|------------------|
| BamHI288ED   | <u>CGGGATCCT</u> CAGTCTAGATAATGCCGGG   | RT-PCR           |
|              | C                                      |                  |
| ATP6CRF      | AACCGGTCTGGAATTAGGTGT                  | CR-RT-PCR        |
| ATP6CRL      | TTCATAGGAATCAATGGGACA                  | CR-RT-PCR        |
| atp6         | ATGAATCAAATAGGGCTGGT                   | probe            |
|              | CCGGTTAATGCAAGAACTAT                   | probe            |
| atp6288UP2   | TCGCTTGGACTATGCTATGT                   | RT-PCR           |
| atp6288DOWN2 | TCGGTTTGGTGATTCACTAT                   | RT-PCR           |
| 288UP3       | TCATCGCCATGGTAATCTCT                   | RT-PCR           |
| 288DOWN3     | GTCGAAGATCCCACCGTGAT                   | RT-PCR           |
| orf288up     | ATGAAAAATAGACTCCAATGG                  | RT-PCR           |
| orf288down   | TCAGTCTAGATAATGCCGGGC                  | RT-PCR           |
| orf288crtF   | GCCCACCAGTGCGAAGAATGA                  | CR-RT-PCR        |
| orf288crtR   | CATTGAGGAGCTTCGGGGTTT                  | CR-RT-PCR        |
| AP3BR        | <u>CGGGATCC</u> ATTCTTCTCTTTGTTTAAT    | Amplification of |
|              | C                                      | ap3 promoter     |
| AP3F         | <u>GGGGTACCC</u> AGTAACTGTGGCCAACTTA   | Amplification of |
|              | GTTTTGAAAC                             | AP3 promoter     |
| coxVIF       | <u>CGGGATCC</u> ATGCTTTCACCTACGTCAATC  | amplification of |
|              | TA                                     | <i>coxVI</i>     |
|              |                                        | presequence      |
| T-288L       | ATAGCCATTGGAGTCTATTTTT <u>CATA</u> AAG | amplification of |

---

---

|        |                                       |                |
|--------|---------------------------------------|----------------|
|        | CAGATATCTAGAGCTACACAAA                | <i>coxVI</i>   |
|        |                                       | presequence    |
| T-288F | TTTGTGTAGCTCTAGATATCTGCTTATG          | amplication of |
|        | AAAAATAGACTCCAATGGCTAT                | <i>orf288</i>  |
| NOSR   | A <u>ACTGCAGGTTTCTTAAGATTGAATCCT</u>  | amplication of |
|        |                                       | NOS sequence   |
| NOSF   | CCC <u>AAGCTT</u> CCCGATCTAGTAACATAGA | amplication of |
|        |                                       | NOS sequence   |
| VNO2   | CGGGATCCATGAAAAATAGACTCCAAT           | amplication of |
|        | GG                                    | <i>orf288</i>  |
| VNOF   | GGGGTACCAGCCTGGGGTGCCTAATGA           | amplication of |
|        | GT                                    | 35S promoter   |
| VNOL   | CGGGATCCGGTCGATCGACAGATCTGC           | amplication of |
|        | GA                                    | 35S promoter   |
| 288L   | ACGCGTCGACTCAGTCTAGATAATGCCG          | amplication of |
|        | GGCATTACCTG                           | <i>orf288</i>  |

---

## FIGURE LEGENDS

**Figure S1** The map of pM999GFP vector.

**Figure S2** Multiple alignment of DNA sequences of *orf288*, *orf286* and *orf263*.

The black arrow indicates that *orf286* is identical to *orf288* at the sites of four single nucleotide differences between *orf288* and *orf263*.

Figure S1

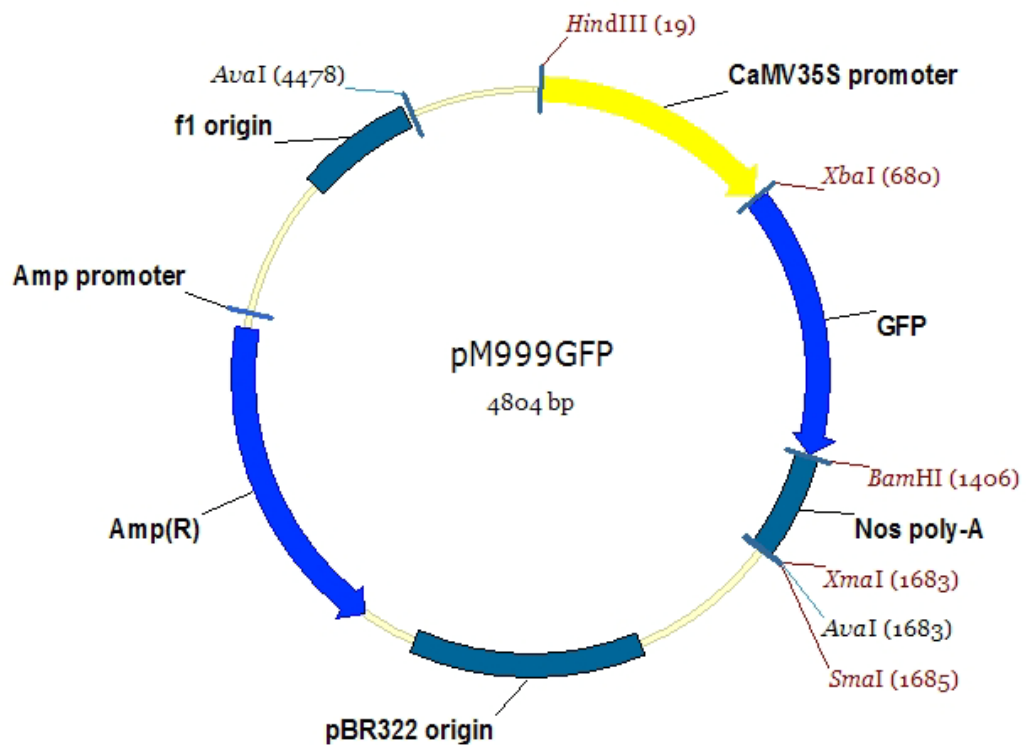

Figure S2

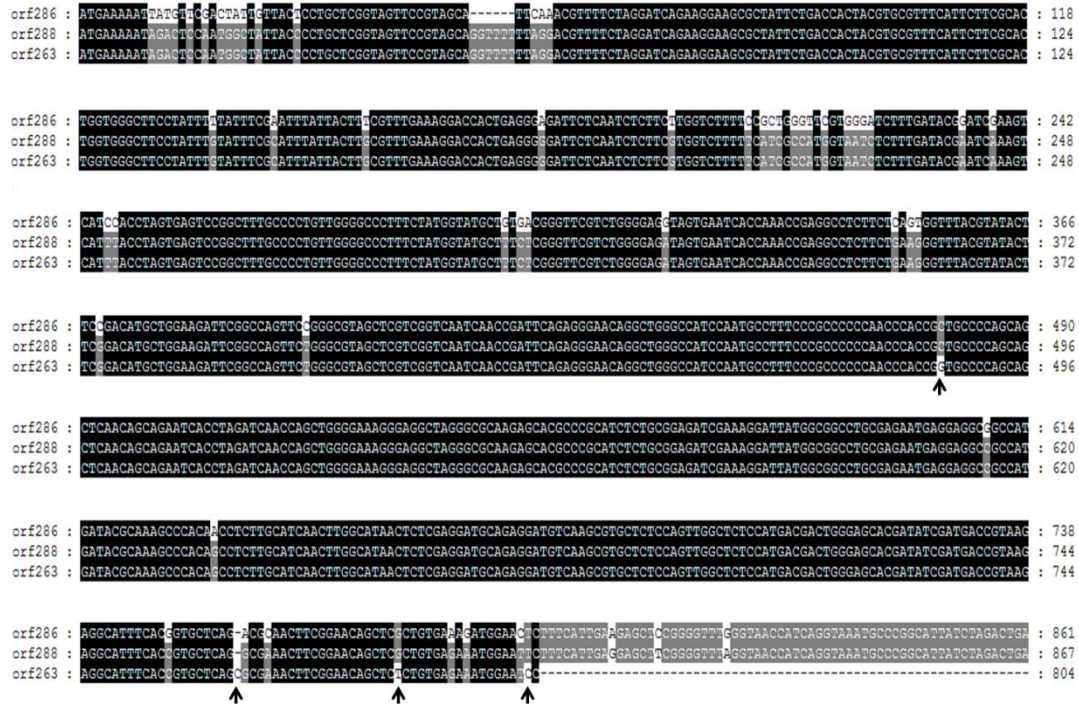

Supplement: supp_err355_00068767_file001.pdf [file supp_err355_00068767_file001.pdf]
